# Supplementary material
Source: PubMed Central journal article supplement (PMC4529957)
Supplement: NIHMS711079-supplement-1.pdf [file NIHMS711079-supplement-1.pdf]

Cell Stem Cell

Supplemental Information

## **dsRNA Released by Tissue Damage Activates TLR3 to Drive Skin Regeneration**

**Amanda M. Nelson, Sashank K. Reddy, Tabetha S. Ratliff, M. Zulfiqer Hossain, Adiya S. Katseff, Amadeus S. Zhu, Emily Chang, Sydney R. Resnik, Carly Page, Dongwon Kim, Alexander J. Whittam, Lloyd S. Miller, and Luis A. Garza**

## Supplemental Figure Legends

### **Supp. Fig 1: Related to Figure 1; Microarray analysis at wound closure but prior to regeneration indicates TLR3 signaling signature.**

- A)** Microarray analysis was performed on healed scars at the earliest time of wound closure and re-epithelialization, prior to morphogenesis (~WD12) on Low Regenerating (LR) and High Regenerating (HR) strains of mice.
- B)** 25 Genes of overlap from Fig **1B** between top 200 genes in HR mice and top 200 genes in dsRNA treated keratinocytes from Karim et al. Fold changes and p-values are from mouse array. Genes in bold are associated with dsRNA recognition or induced by interferon, known TLR3 effects.
- C)** Wound closure and healing were monitored daily in strain-matched control and TLR3 null mice and average day of scab detachment (SD) as an indication of epithelialization; n = 6 mice.
- D)** Representative image of non-wounded murine skin after control or poly (I:C) injection (500ng/mouse) during telogen showing no change in hair cycle.

### **Supp. Fig. 2: Related to Figure 2; Gene expression analysis and qRT-PCR verification of gene expression changes on late stage microarrays.**

- A)** Microarray analysis was performed on healed scars at WD16 on three LR and HR mouse scars as indicated.
- B)** Signaling pathways enriched and selected changed genes in samples with high regeneration.
- C)** Top 5 genes associated with enriched signaling pathways in **1B**.
- D)** Selected significantly changed interleukins, chemokines, and cytokines in HR.
- E)** Top gene ontology “functions” enriched in HR.
- F)** qRT-PCR verification of microarray gene expression of selected genes: Interleukin 6 (IL-6); interleukin 10 (IL-10), forkhead box protein P3 (Foxp3). Data represent the Mean  $\pm$  SE of the fold change in gene expression; n = 5-10; \*p < 0.05
- G)** Mean fold change in IL-6 mRNA with RelA-specific or scrambled control siRNA in the presence of poly (I:C) (20 $\mu$ g/mL) in keratinocytes as determined by qRT-PCR and normalized to housekeeping gene, RPLP0.

### **Supp. Fig 3: Related to Figure 3; P-STAT3 and IL-6 protein expression during wound healing after Poly IC or rmIL-6 treatment.**

P-Stat3 and IL-6 immunohistochemistry in healing murine wounds after poly (I:C) treatment at WD3 or rmIL-6 treatment at WD7; Wounds were harvested 24hrs after treatment and representative images are shown. IL-6 and P-Stat3 positivity is increased during early wound healing (WD4) compared to late wound healing (WD8). Scale bar = 50  $\mu$ m; original magnification: 40X.

### **Supp. Fig 4: Related to Figure 4; Increased stratification and altered keratinocyte morphology after IL-6 and TLR3 activation in keratinocytes.**

- A)** Cleaved caspase 3 and Ki-67 immunohistochemistry on healed murine wounds after rmIL-6 treatment; representative images are shown. Scale bar = 100 $\mu$ m; original magnification: 20X.
- B)** Mean fold change in TLR3 mRNA with TLR3-specific siRNA or siCON (control siRNA) 24 hours after poly (I:C) treatment of NHEKs for 24 hours as determined by qRT-PCR and normalized to housekeeping gene, RPLP0. N=3, \* p < 0.05.
- C)** Keratinocyte morphology 72 hours after 24 hours of poly (I:C) (20 $\mu$ g/mL) or control treatment to NHEK as determined immunofluorescence staining with phalloidin (green), pan-cadherin (red) and DAPI (blue). Magnification = 60X.

- D)** Quantitation of length to width ratio of keratinocyte morphology as in 4C.
  - E)** Vimentin and keratin 5 immunofluorescence staining in NHEK after poly (I:C) or control as in 4C.
  - F)** Mean fold change in VIM mRNA after poly (I:C) (20 $\mu$ g/mL) addition to NHEK for 24 hours at indicated time points as determined by qRT-PCR and normalized to housekeeping gene, RPLP0.
  - G)** Quantification of vimentin expression via flow cytometry in NHEK after poly (I:C) or control as in 4F or normal fibroblasts.
  - H)** Non-directional keratinocyte migration ( $\mu$ m/hr) after vehicle control or poly (I:C) (20 $\mu$ g/mL) continuous exposure for 7 days.
- \*p < 0.05 by Student's T-test or Single Factor ANOVA.

**Supp. Fig. 5: Related to Figure 5; TLR3 KO mice have fewer  $\gamma\delta$ T-cells and WIHN is not impacted in NSG mice.**

- A)** Mean percentage of TCR $\gamma\delta$  cells in newly healed wounds in wild type and TLR3 KO mice. Representative FlowJo vX dot plots are shown. N= 3-5 mice per genotype; \*p = 0.001.
- B)** WIHN is not affected in NOD.Cg-*Prkdc*<sup>scid</sup> *Il2rg*<sup>m1Wjl</sup>/SzJ mice lacking T and B cell lineages. Cross-sectional H&E histology through the middle of healed scar at WD22 in NSG mice, average number of hair follicles =13; n = 5 mice as measured by CSLM. Regenerated hair follicles are marked with arrows. Scale bar = 100  $\mu$ m. Original objective: 20X.

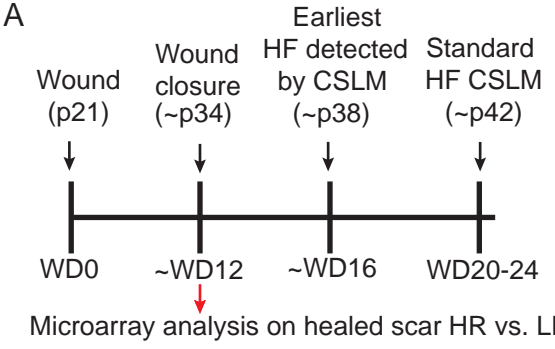

**B**

| Gene Symbol        | Gene Name                                                   | p-value  | Fold Δ | Gene Function                                                  |
|--------------------|-------------------------------------------------------------|----------|--------|----------------------------------------------------------------|
| <i>IFIT1</i>       | Interferon-Induced Protein With Tetratricopeptide Repeats 1 | 3.12E-05 | 3.9194 | Interferon induced; anti-viral RNA binding protein             |
| <i>LCE3</i>        | Late Cornified Envelope 3                                   | 1.27E-02 | 3.6914 | Precursor of cornified envelope                                |
| <i>IFI44</i>       | Interferon-Induced 44kDa protein                            | 1.81E-05 | 3.6779 | Interferon induced; microtubular structure                     |
| <i>OAS1</i>        | 2',5' Oligosynthetase 1                                     | 1.35E-04 | 2.7335 | Innate immune response to viral infection                      |
| <i>ISG15</i>       | Interferon Stimulated Gene 15                               | 8.24E-05 | 2.6225 | Activated by IFNs; Ubiquitin-like protein; targets RIG-I       |
| <i>IRF7</i>        | Interferon Regulatory Factor 7                              | 2.54E-06 | 2.2975 | Innate immune response against DNA/RNA virus                   |
| <i>OAS2</i>        | 2',5' Oligosynthetase 2                                     | 1.73E-03 | 2.2851 | Innate immune response to viral infection                      |
| <i>CXCL11</i>      | Chemokine (C-X-C Motif) Ligand 11                           | 1.36E-04 | 2.1059 | Induced by IFNs, skin immune response                          |
| <i>OAS3</i>        | 2',5' Oligosynthetase 3                                     | 1.69E-04 | 2.0748 | Innate immune response to viral infection                      |
| <i>RSAD2</i>       | Radical S-Adenosyl Methionine Domain Containing 2           | 1.78E-04 | 2.0589 | Interferon-inducible; anti-viral activity                      |
| <i>OASL</i>        | 2',5' Oligosynthetase-Like                                  | 4.49E-04 | 1.9994 | Innate immune response to viral infection                      |
| <i>BST2</i>        | Bone Marrow Stromal Antigen                                 | 7.70E-05 | 1.9656 | IFN-induced anti-viral factor                                  |
| <i>DXH58</i>       | DEXH (Asp-Glu-X-His) Box Polypeptide 58                     | 4.28E-04 | 1.9042 | Regulates DDX58; directly binds dsRNA                          |
| <i>DDX58/RIG-I</i> | Retinoic Acid-Inducible Gene 1 Protein                      | 7.15E-04 | 1.8025 | Recognizes dsRNA; innate immune response                       |
| <i>PARP14</i>      | Poly (ADP-Ribose) Polymerase Family, Member 14              | 2.36E-04 | 1.7923 | Post-translational modification of histones after DNA damage   |
| <i>XAF1</i>        | XIAP Associated Factor 1                                    | 3.41E-04 | 1.7069 | Negative regulator of "inhibitor of apoptosis" (XIAP) proteins |
| <i>HERC6/HERC5</i> | HECT And RLD Domain Containing E3 Ubiquitin Protein Ligase  | 2.20E-04 | 1.6458 | Ubiquitin ligase                                               |
| <i>IFI35</i>       | Interferon-Induced 35kDa protein                            | 3.86E-05 | 1.6281 | Interferon induced                                             |
| <i>CXCL9</i>       | Chemokine (C-X-C Motif) Ligand 9                            | 7.13E-02 | 1.6075 | T-cell trafficking; immune and inflammatory response           |
| <i>MMP9</i>        | Matrix Metalloproteinase 9 (Gelatinase)                     | 4.07E-02 | 1.6037 | Tissue remodeling                                              |
| <i>CMPK2</i>       | Cytidine Monophosphate (UMP-CMP) Kinase 2                   | 4.71E-04 | 1.5895 | Nucleotide synthesis salvage pathway                           |
| <i>GBP4</i>        | Guanylate Binding Protein 4                                 | 2.75E-02 | 1.3757 | Induced by IFNs; hydrolyzes GTP                                |
| <i>DEFB103B</i>    | Beta-Defensin 3                                             | 8.88E-02 | 1.2254 | Antimicrobial peptide                                          |
| <i>HELZ2</i>       | Helicase With Zinc Finger                                   | 3.28E-01 | 1.1411 | Helicase                                                       |
| <i>TRIM5</i>       | Tripartite Motif Containing 5                               | 2.75E-04 | 1.1368 | Blocks viral replication                                       |

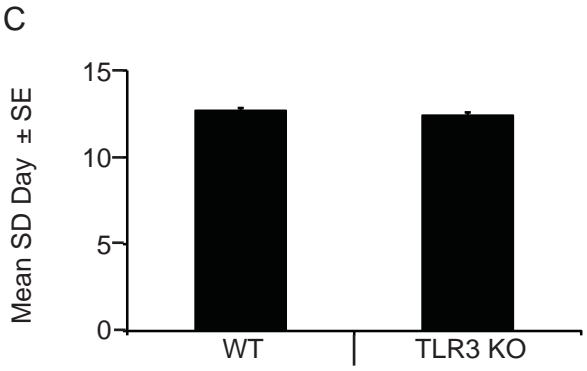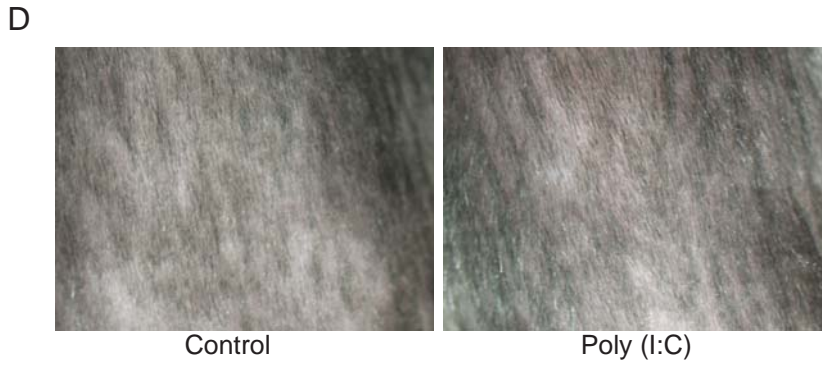

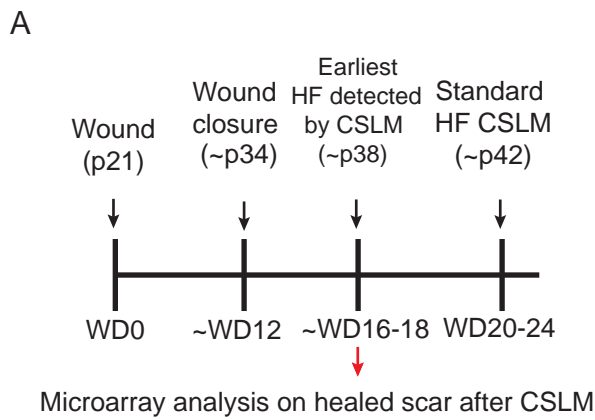

**B**

| Signaling Pathway               | P-value          |
|---------------------------------|------------------|
| <b>JAK/STAT</b>                 | <b>0.0000276</b> |
| Corticotropin Releasing Hormone | 0.000154         |
| <b>IL-6 Signaling</b>           | <b>0.000212</b>  |
| IL-10 Signaling                 | 0.000626         |
| <b>Acute Phase Response</b>     | <b>0.000758</b>  |

**C**

| Gene Symbol | Fold $\Delta$ | P-value  |
|-------------|---------------|----------|
| IL-6        | 3.348         | 0.0253   |
| TNFAIP6     | 2.518         | 0.0498   |
| SOCS3       | 2.183         | 0.0317   |
| SERPINE1    | 2.175         | 0.0141   |
| Fos         | 2.02          | 0.000291 |

**D**

| Gene Symbol  | Fold $\Delta$ | P-value       |
|--------------|---------------|---------------|
| Wdr92        | 6.26          | 0.0150        |
| <b>Ccl24</b> | <b>4.23</b>   | <b>0.0065</b> |
| Ptgs2        | 3.72          | 0.0042        |
| <b>Il-6</b>  | <b>3.35</b>   | <b>0.0253</b> |
| Nr4a1        | 2.92          | 0.0012        |
| <b>Cxcl2</b> | <b>2.52</b>   | <b>0.0467</b> |
| <b>Cxcl1</b> | <b>2.10</b>   | <b>0.0025</b> |
| <b>Il-1b</b> | <b>1.93</b>   | <b>0.0175</b> |
| <b>Ccl3</b>  | <b>1.79</b>   | <b>0.0186</b> |
| <b>Il-10</b> | <b>1.71</b>   | <b>0.0341</b> |

↑  
high *W/IN* phenotype  
Interleukins  
Chemokines  
Cytokines

**E**

| GO Bio Function Term   | # of genes | P-value            |
|------------------------|------------|--------------------|
| Hematological Function | 195        | 0.00001 < P < 0.01 |
| Inflammatory response  | 110        | 0.00001 < P < 0.01 |
| Infection mechanism    | 105        | 0.0001 < P < 0.01  |
| Cell-mediated immunity | 93         | 0.00001 < P < 0.01 |
| Organism development   | 77         | 0.0001 < P < 0.01  |

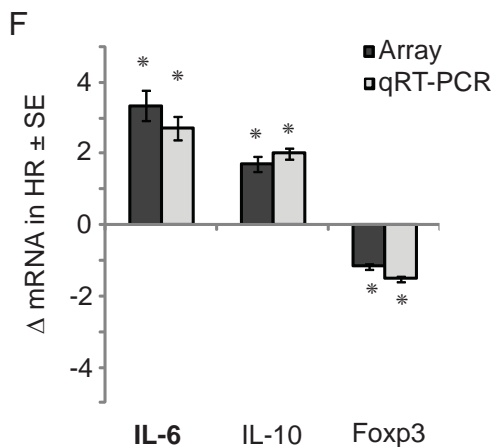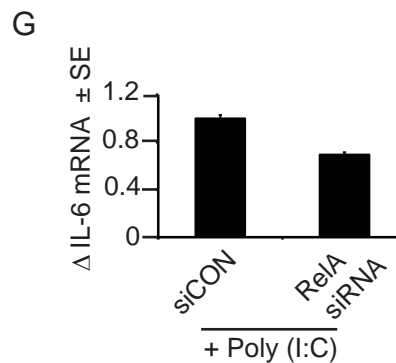

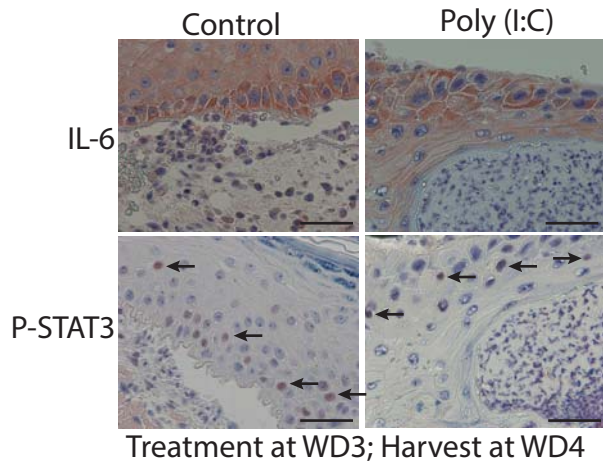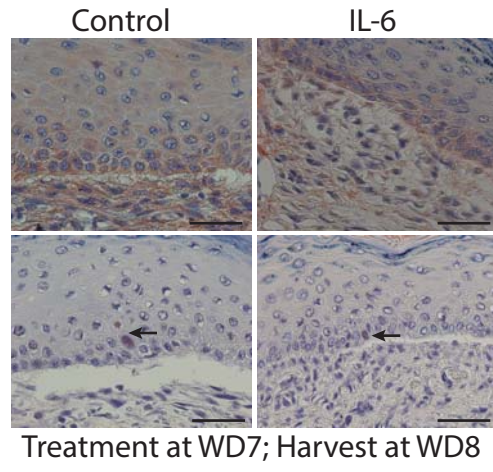

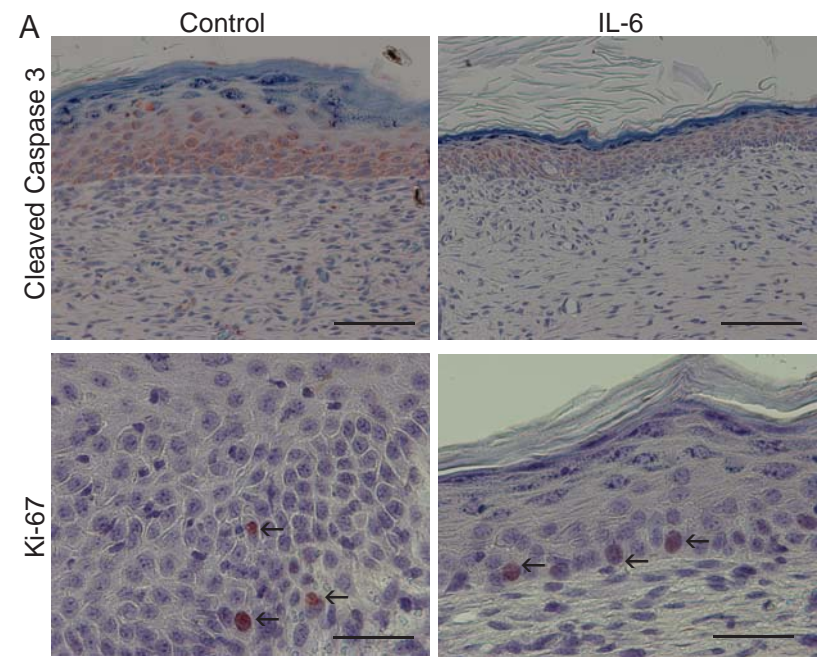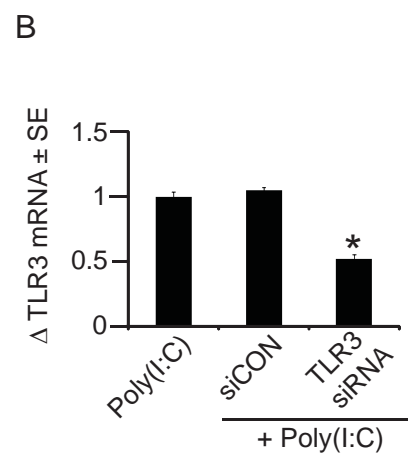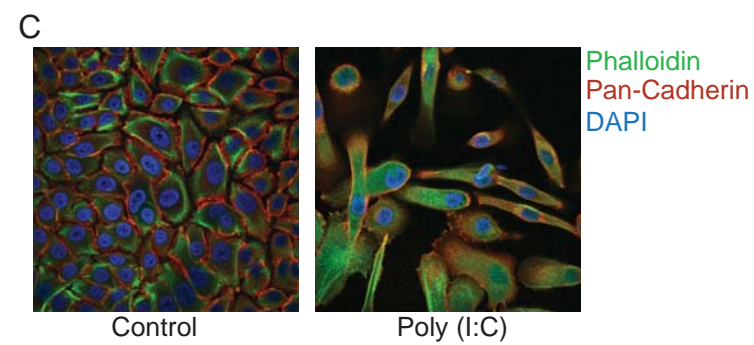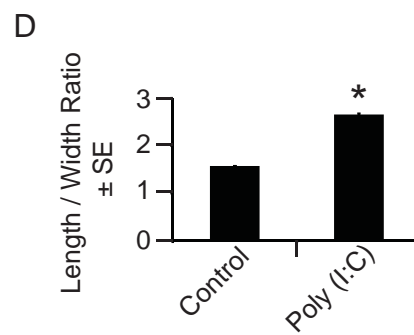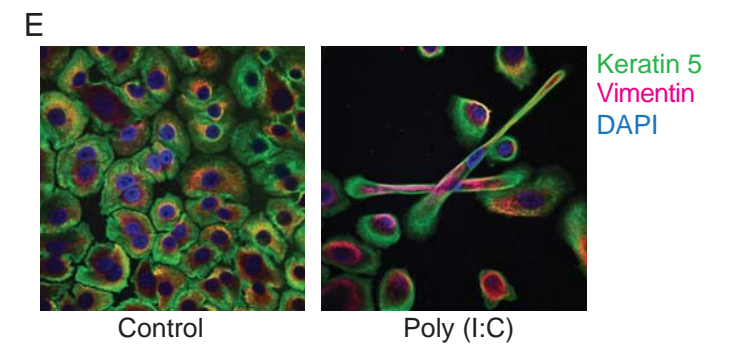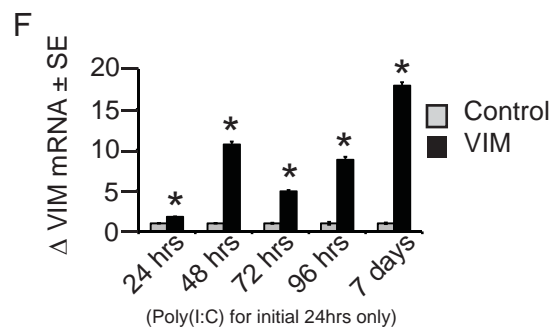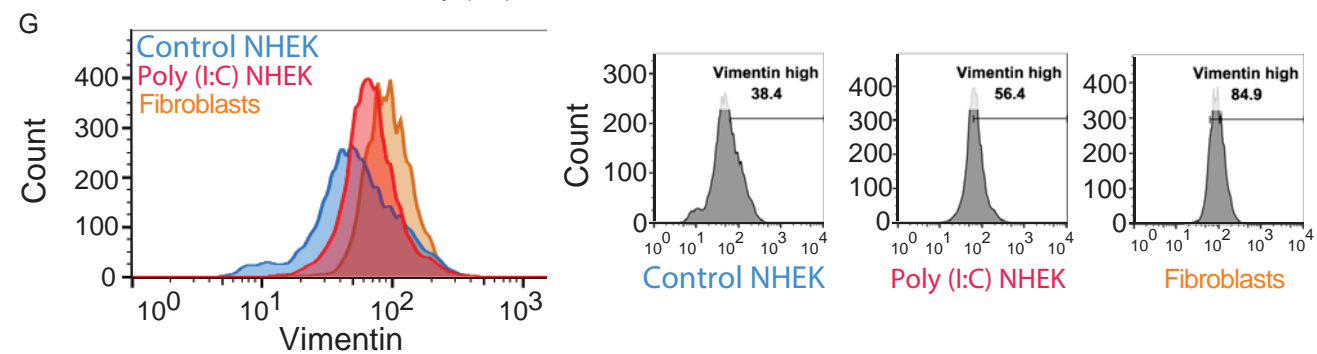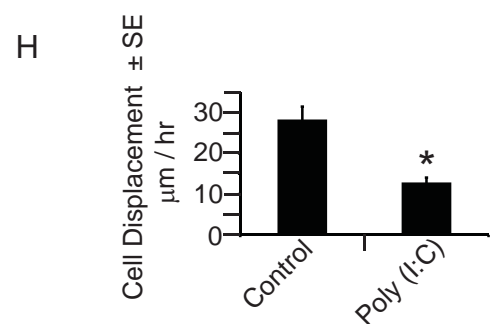



A

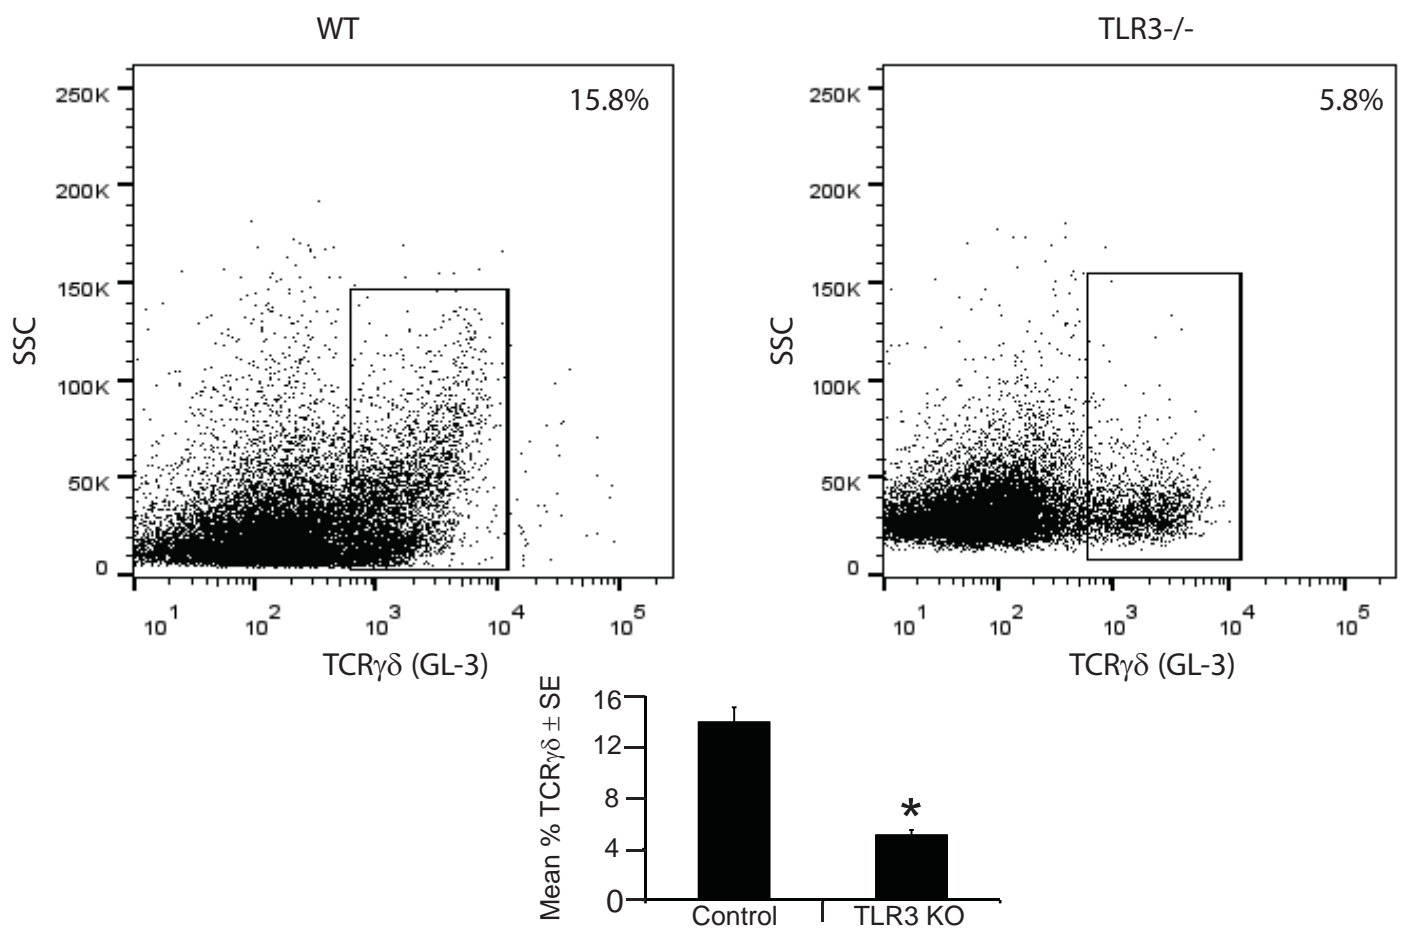

B

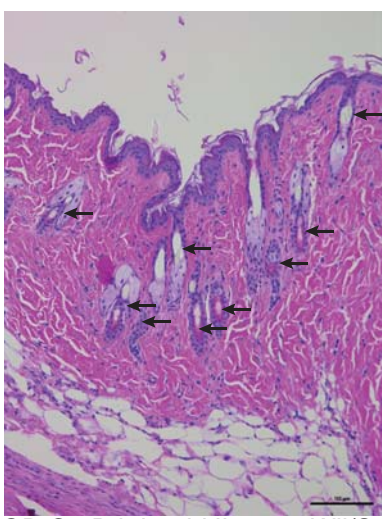

NOD.Cg-Prkdcscid Il2rgtm1Wjl/SzJ



## Expanded Experimental Methods

### Antibodies

Rabbit polyclonal antibodies to phosphorylated Stat 3, Stat3, Ki-67, cleaved caspase 3,  $\beta$ -actin and secondary anti-rabbit HRP were obtained from Cell Signaling Technology (Danvers, MA). Anti-cytokeratin 1 (Krt1), anti-IL-6, anti-KRT15 (LHK15), anti-Wnt7b (ab94915) and anti-pan-cadherin antibodies were obtained from Abcam (Cambridge, MA). Mouse monoclonal  $\beta$ -catenin antibody (14) and vimentin (RV202) were obtained from BD Biosciences (San Jose, CA) and rabbit polyclonal keratin 5 antibody was purchased from Covance (Princeton, NJ). FITC-Phalloidin was obtained from Sigma (St Louis, MO). Mouse and rabbit IgG isotype controls were purchased from Invitrogen (Camarillo, CA).

### Treatments during WIHN assay

Recombinant mouse IL-6 protein (R&D Systems, Minneapolis, MN) and poly(I:C) (High Molecular Weight; InVivoGen, San Diego, CA) was diluted in sterile PBS immediately prior to injection. Cucurbitacin I (Tocris Biosciences/R&D Systems, Minneapolis MN) was dissolved in 10% EtOH/PBS to a final concentration of 1mg/mL prior to injection. RNase III enzyme (Life Technologies, Grand Island NY) was diluted in supplied reaction buffer.

### Keratinocyte Migration Assay

Keratinocytes were seeded onto LabTek II Chambered Coverglass 8-well slides (Thermo, cat. 155409) which had been coated with rat tail collagen I (Gibco, cat: A10483-01). Poly(I:C) was first added (20 ug/ml) 2 days after plating cells (~30% confluent). Subsequently, fresh culture medium (KGM-Gold) and poly(I:C) was applied every other day. At the time of imaging, cells were exposed to poly(I:C) for 7 days. Extended time-lapse imaging was done at the JHU Microscope Facility (acknowledgements: Barbara Smith and Dr. Scot Kuo) for 24 hours inside a humidified, 5% CO<sub>2</sub> chamber. Cell migration rate was quantified using SlideBook Reader 6 software (Intelligent Imaging Innovations) by measuring overall cell displacement over the course of one hour (18 cells per video, 3 videos per condition).

### ChIP

The amplicon for Gli2 promoter site 4 encompasses TTCCAGGAA on chr2: 121621123-121621782 in the Encode database.

It was amplified with the primer sequences: a) forward: 5'CACAGATAAGCTGAGTCACAGGA3'; b) reverse: 5'TCCTGTTACATTGACGCC3'. The amplicon for  $\beta$ -catenin promoter site 4 encompasses TTCCTGGAA on chr3: 41264037-41264357 in the Encode database.

This was amplified with the primer sequences: a) forward: 5'TGCCTTTGCATCAACAACAAGG3'; b) reverse: 5'TCAGAAACCAACTGGTCATGTCT3'.
